# Supplementary material for: Greener technology for organic reactive dye degradation in textile dye-contaminated field soil and in situ formation of “electroactive species” at the anode by electrokinetics
Source: Royal Society of Chemistry journal article supplement (doi:10.1039/c5ra20344a), 2015-12-17
Supplement: c5ra20344a1.pdf [file c5ra20344a1.pdf]

## Supplementary Materials

| Experiments | Electrolyte                          |                                      |
|-------------|--------------------------------------|--------------------------------------|
|             | Anolyte                              | Catholyte                            |
| System I    | 0.5 M K <sub>2</sub> SO <sub>4</sub> | 0.5 M K <sub>2</sub> SO <sub>4</sub> |
| System II   | Distilled water                      | Distilled water                      |

**SM. Table 1** Experimental details during electrokinetic process

Two sample t Test (12-Nov-15 12:43:33)

### Notes

|            |                    |
|------------|--------------------|
| X-Function | Two sample t Test  |
| User Name  | home               |
| Time       | 12-Nov-15 12:43:33 |

### Input Data

|                | Data            | Range    |
|----------------|-----------------|----------|
| 1st Data Range | [Book2]Sheet1!A | [1*:25*] |
| 2nd Data Range | [Book2]Sheet1!B | [1*:25*] |

### Descriptive Statistics

|            | N  | Mean   | SD        | SEM      |
|------------|----|--------|-----------|----------|
| A          | 25 | 171.8  | 112.66691 | 22.53338 |
| B          | 25 | 52.72  | 41.11216  | 8.22243  |
| Difference |    | 119.08 |           |          |

### t-Test Statistics

|                            | t Statistic | DF       | Prob> t    |
|----------------------------|-------------|----------|------------|
| Equal Variance Assumed     | 4.96442     | 48       | 9.09938E-6 |
| Equal Variance NOT Assumed | 4.96442     | 30.27996 | 2.51802E-5 |

Null Hypothesis: mean1-mean2 = 0  
Alternative Hypothesis: mean1-mean2 <> 0  
At the 0.05 level, the difference of the population means is significantly different with the test difference(0)

(a)

Two sample t Test (12-Nov-15 14:26:05)

### Notes

|            |                    |
|------------|--------------------|
| X-Function | Two sample t Test  |
| User Name  | home               |
| Time       | 12-Nov-15 14:26:05 |

### Input Data

|             | Data            | Range |
|-------------|-----------------|-------|
| Group Range | [Book2]Sheet1!E | [1:5] |
| Data Range  | [Book2]Sheet1!F | [1:5] |

### Descriptive Statistics

|            | N | Mean   | SD        | SEM      |
|------------|---|--------|-----------|----------|
| E          | 5 | 285.8  | 146.55954 | 65.54342 |
| F          | 5 | 542    | 204.39423 | 91.40788 |
| Difference |   | -256.2 |           |          |

### t-Test Statistics

|                            | t Statistic | DF      | Prob> t |
|----------------------------|-------------|---------|---------|
| Equal Variance Assumed     | -2.27778    | 8       | 0.05225 |
| Equal Variance NOT Assumed | -2.27778    | 7.25322 | 0.05554 |

Null Hypothesis: mean1-mean2 = 0  
Alternative Hypothesis: mean1-mean2 <> 0  
At the 0.05 level, the difference of the population means is NOT significantly different with the test difference(0)

(b)

Two sample t Test (12-Nov-15 12:51:06)

Notes

|            |                    |
|------------|--------------------|
| X-Function | Two sample t Test  |
| User Name  | home               |
| Time       | 12-Nov-15 12:51:06 |

Input Data

|             | Data            | Range |
|-------------|-----------------|-------|
| Group Range | [Book2]Sheet1!C | [1:5] |
| Data Range  | [Book2]Sheet1!D | [1:5] |

Descriptive Statistics

|            | N | Mean   | SD      | SEM      |
|------------|---|--------|---------|----------|
| C          | 5 | 154.4  | 31.0129 | 13.86939 |
| D          | 5 | 291.6  | 94.0654 | 42.06733 |
| Difference |   | -137.2 |         |          |

t-Test Statistics

|                            | t Statistic | DF      | Prob> t |
|----------------------------|-------------|---------|---------|
| Equal Variance Assumed     | -3.09744    | 8       | 0.01472 |
| Equal Variance NOT Assumed | -3.09744    | 4.85944 | 0.02797 |

Null Hypothesis: mean1=mean2 = 0  
 Alternative Hypothesis: mean1=mean2 <> 0  
 At the 0.05 level, the difference of the population means is significantly different with the test difference(0)

(c)

SM. Table 2 Student's T-Test analysis for various experiment (a) EOF, (b) chloride, (c) TOC

| S.No             | Trace metal,<br>(mg kg <sup>-1</sup> ) | Before<br>EK | After EK                           |       |       |       |      |
|------------------|----------------------------------------|--------------|------------------------------------|-------|-------|-------|------|
|                  |                                        |              | Soil section from anode to cathode |       |       |       |      |
|                  |                                        |              | S1                                 | S2    | S3    | S4    | S5   |
| <b>System I</b>  |                                        |              |                                    |       |       |       |      |
| 1                | Nickel                                 | 0.23         | 0.01                               | 0.07  | 0.16  | 0.13  | 0.20 |
| 2                | Chromium                               | 0.25         | 0.09                               | 0.092 | 0.024 | 0.087 | 0.17 |
| 3                | Copper                                 | 5.5          | 8.50                               | 3.20  | 3.00  | 3.74  | 3.60 |
| <b>System II</b> |                                        |              |                                    |       |       |       |      |
| 1                | Nickel                                 | 0.23         | 0.09                               | 0.12  | 0.19  | 0.15  | 0.21 |
| 2                | Chromium                               | 0.25         | 0.176                              | 0.21  | 0.082 | 0.149 | 0.47 |
| 3                | Copper                                 | 5.5          | 4.94                               | 4.02  | 3.38  | 3.96  | 3.97 |

SM. Table 3 Trace metals concentration in different sections in contaminated soil before and after electrokinetic experiment.

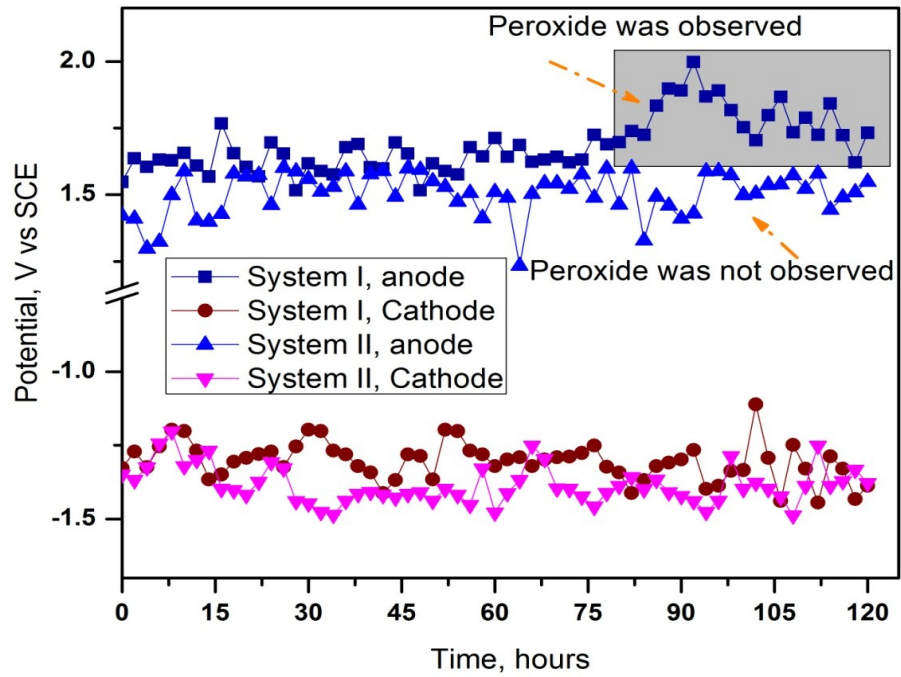

SM. Fig. 1 Measurement of potential during electrokinetic process

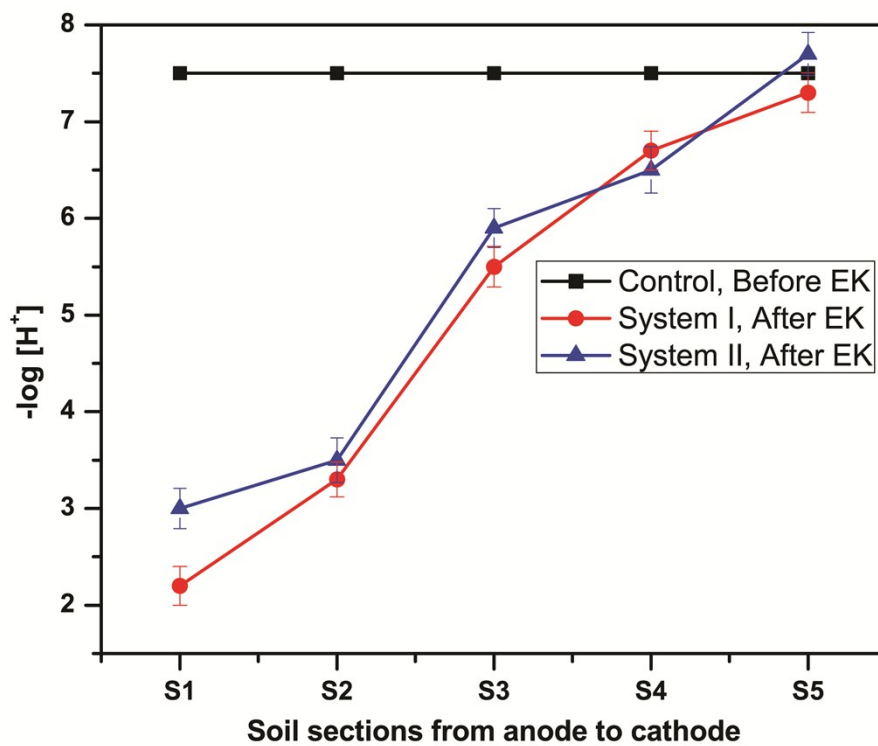

SM. Fig. 2 pH profile of the soil after completing electrokinetic system

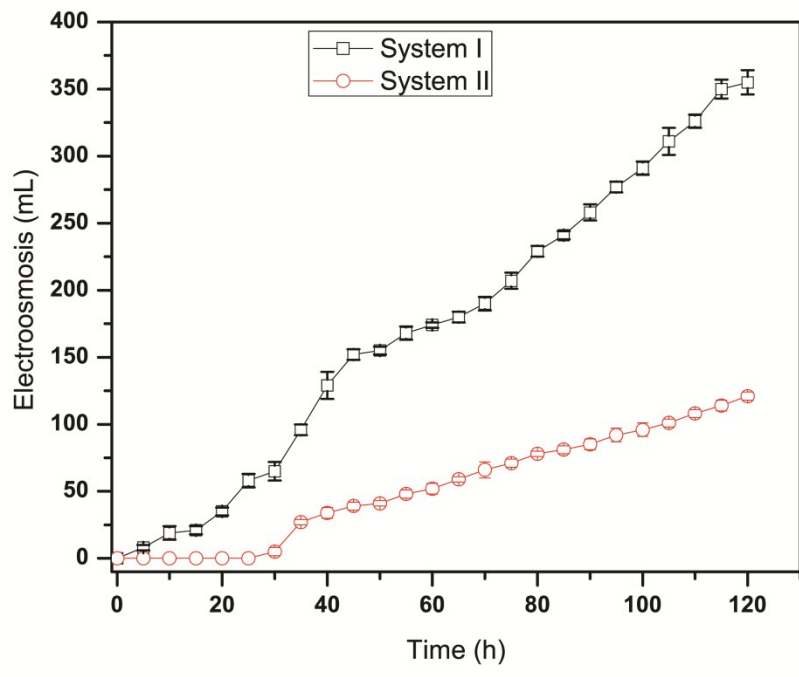

**SM. Fig. 3** Measurement of electroosmosis during electrokinetic experiment

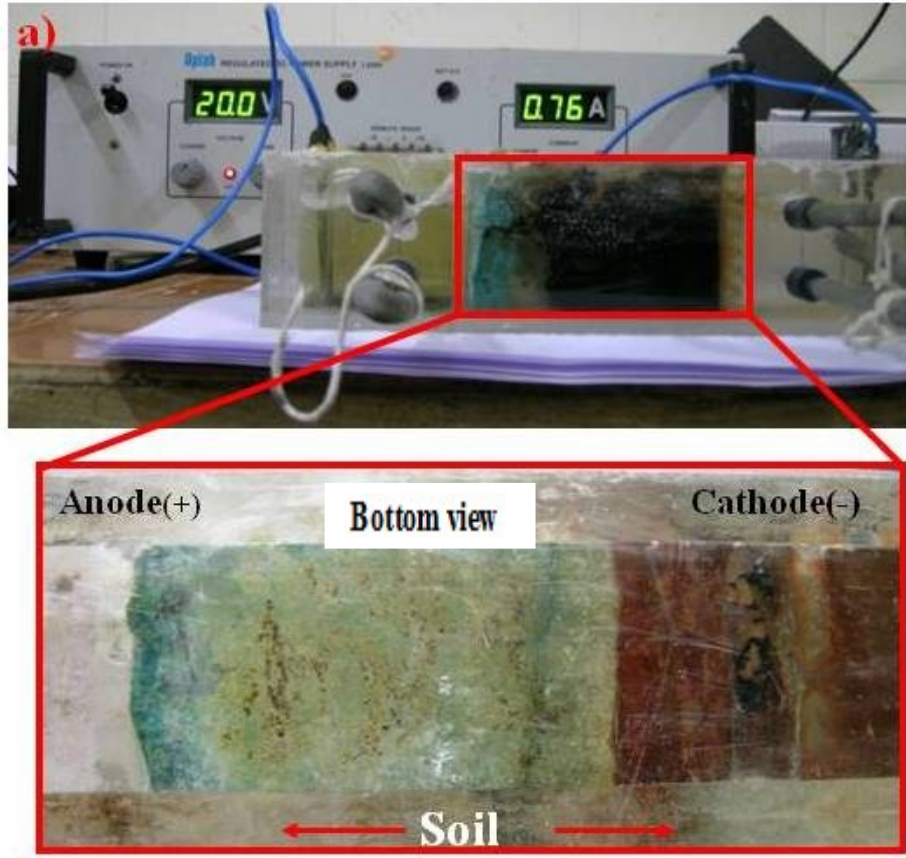

SM. Fig. 4. The mobility of dyes in soil compartment during electrokinetic process

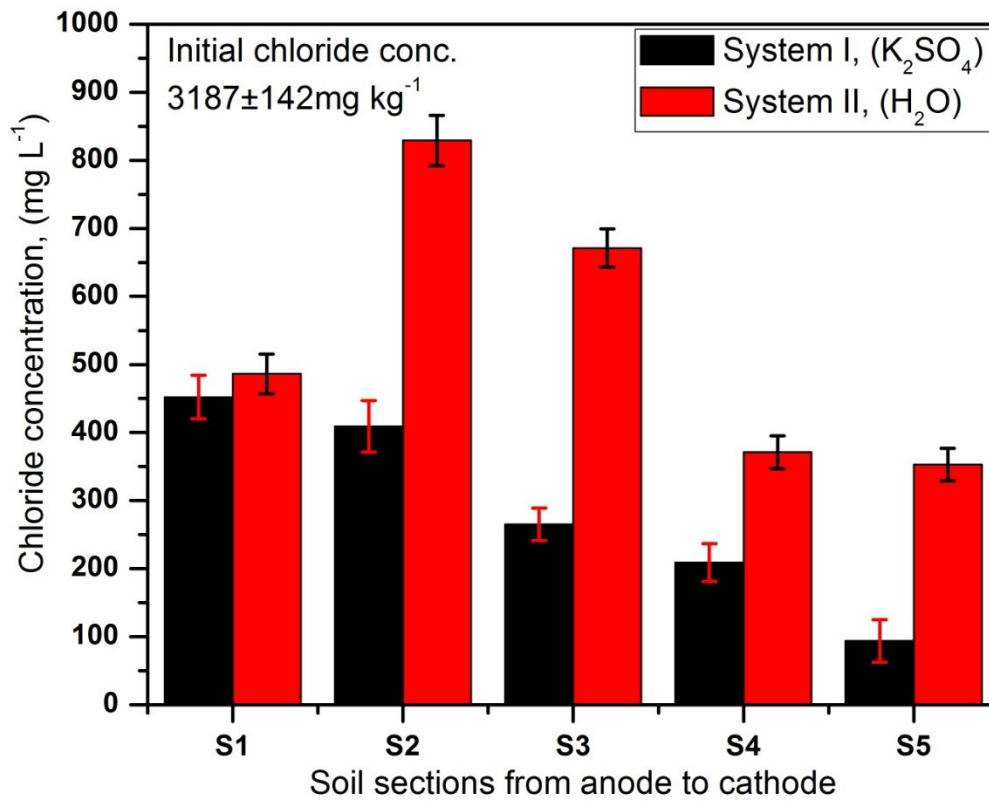

SM. Fig. 5 Mobility of chloride in contaminated soil before and after electrokinetic experiment.
